# Supplementary material for: IPA1 functions as a downstream transcription factor repressed by D53 in strigolactone signaling in rice
Source: PubMed Central journal article supplement (PMC5587847; doi:10.1038/cr.2017.102), 2017-08-15
Supplement: cr2017102x3.pdf [file cr2017102x3.pdf]

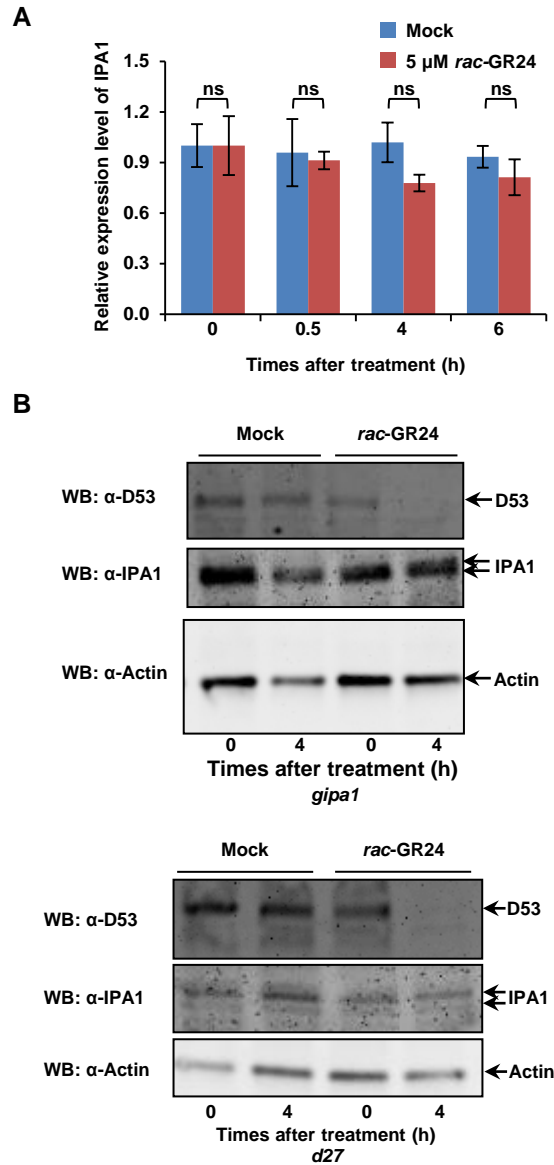

**Figure S3** Expression and protein levels of *IPA1* after *rac*-GR24 treatment. **(A)** Expression levels of *IPA1* after *rac*-GR24 treatment. Rice *Actin1* was used as a reference. Values are means  $\pm$  SE ( $n = 3$ ). Statistical difference was determined by Student's *t* test ( $n = 3$ ). ns, no significant difference. **(B)** Protein levels of IPA1 and D53 after *rac*-GR24 treatment in *ipa1-1D* genomic sequence transgenic line (*gipa1*) and *d27* mutant. Actin was used as the loading control.
