# Supplementary material for: IPA1 functions as a downstream transcription factor repressed by D53 in strigolactone signaling in rice
Source: PubMed Central journal article supplement (PMC5587847; doi:10.1038/cr.2017.102), 2017-08-15
Supplement: cr2017102x5.pdf [file cr2017102x5.pdf]

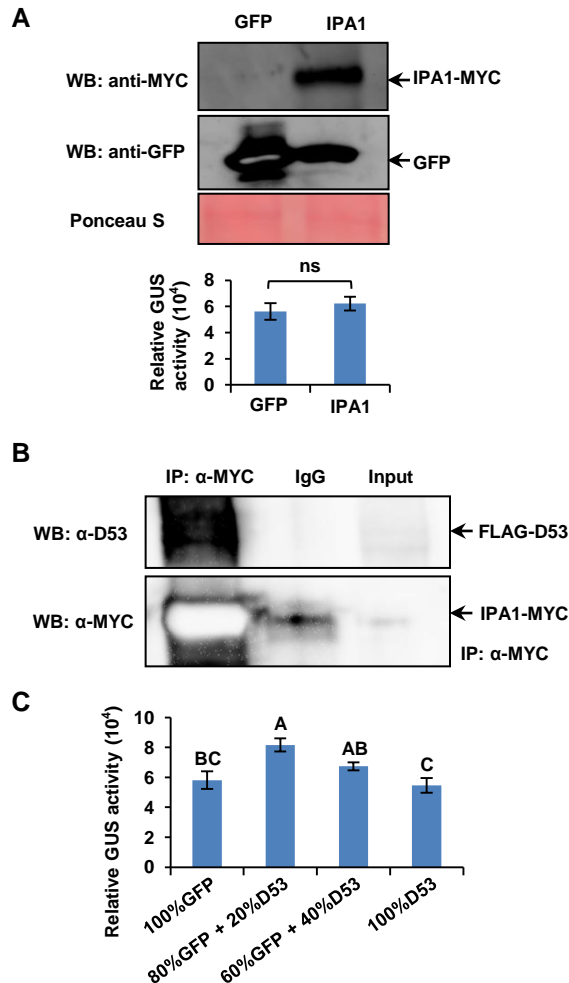

**Figure S5** Expression of the fusion proteins and interaction between IPA1 and D53 in tobacco leaves. **(A)** Protein levels of the fusion proteins in the infiltration assay in Figure 3A. D53 was detected by rabbit polyclonal antibodies anti-D53, GFP by mouse monoclonal antibody anti-GFP, and IPA1 by rabbit polyclonal antibodies anti-IPA1. Ponceau S staining was used as the loading control. GUS activity was measured with the substrate 4-MUG and used as an internal control to indicate similar protein expression in different infiltration combinations. Values in the lower panel are means  $\pm$  SD ( $n = 6$ ). Statistical difference was determined by Student's *t* test. ns, no significant difference. **(B)** Interaction between IPA1 and D53 revealed by the Co-IP assay in tobacco leaves. Immunoprecipitation was performed with anti-MYC-agarose and immunoblotting was carried out with anti-D53 antibody and anti-MYC antibody, respectively. The IgG-agarose was used as a negative control. **(C)** The GUS activity in different infiltration combinations in Figure 3C. GUS activity was measured with the substrate 4-MUG and used as an internal control to indicate similar protein expression levels in different infiltration combinations. Values are means  $\pm$  SD ( $n = 6$ ). Different letters at top of each column indicate a significant difference at  $P < 0.05$  determined by Tukey's HSD test.
